# Supplementary material for: Investigating cooperation with robotic peers
Source: PLOS journal article supplement (doi:10.1371/journal.pone.0225028), 2019-11-20

# S1 Fig. Experimental Timeline.

Detailed description of the game phases during the experiment for the anthropomorphic robot confederate

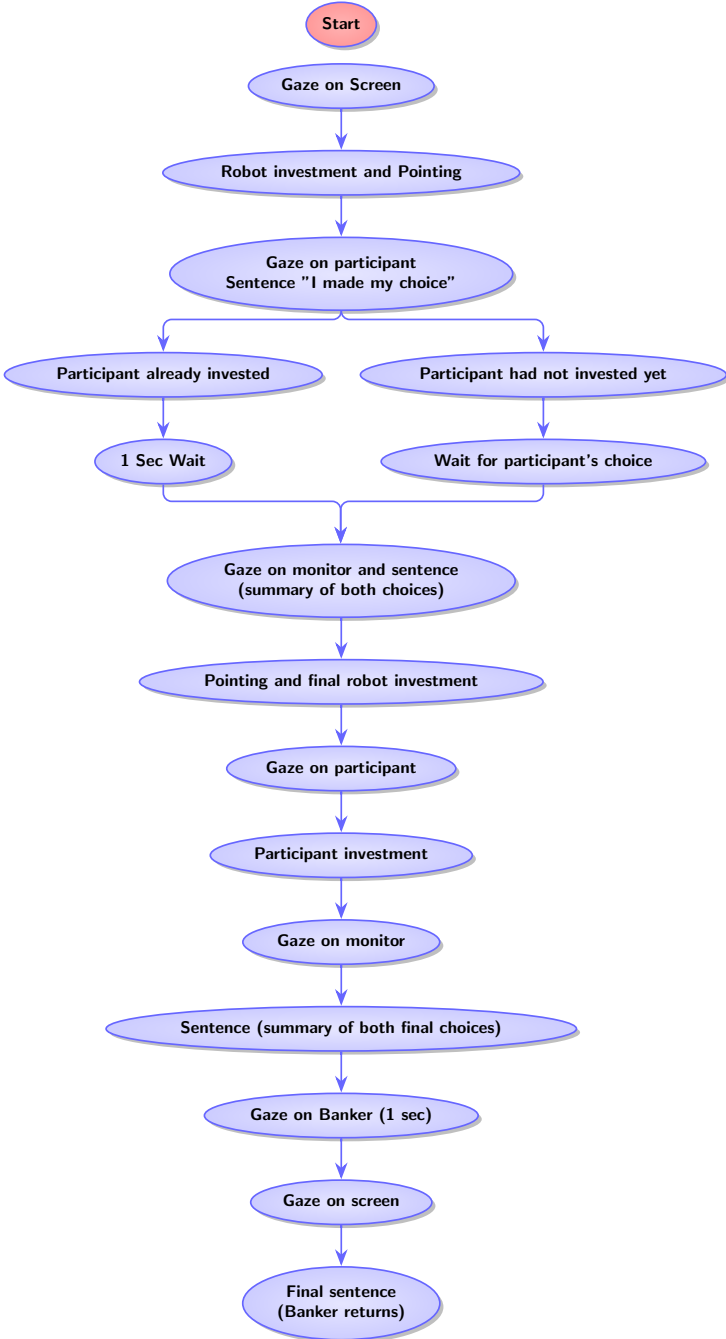

Supplement: S1 (10.1371/journal.pone.0225028.s001) [file journal.pone.0225028.s001]
